# Supplementary material
Source: Springer Nature journal article supplement (https://www.springermedizin.de/resource/supplementary/13058_2013_3450_MOESM10_ESM.pdf/9704052)
Supplement: MOESM10 [file 9704052]

**A**

| Sample                      | <i>PIK3CA</i> Exon Mutations |
|-----------------------------|------------------------------|
| SUT1097 patient             | Exon 6, 1173A>G, I391M       |
| SUT1097 xenograft           | Exon 6, 1173A>G, I391M       |
| SUT1103 patient             | None                         |
| SUT1103 xenograft           | None                         |
| SUT1110 patient             | Exon 20, 3302 G>C, G1049R    |
| SUT1110 xenograft           | Exon 20, 3302 G>C, G1049R    |
| SUT1151 patient             | None                         |
| SUT1151 xenograft           | None                         |
| SUT1151M patient            | None                         |
| SUT1151M xenograft          | None                         |
| SUT1319 patient             | None                         |
| SUT1319 xenograft passage 3 | None                         |
| SUT1319 xenograft passage 5 | None                         |
| SUT1368 patient             | None                         |
| SUT1368 xenograft           | None                         |

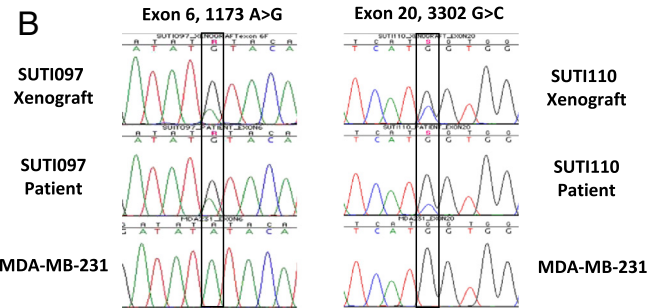

**C**

| Sample                                        | <i>PIK3CA</i> Intron SNPs                                                                                |
|-----------------------------------------------|----------------------------------------------------------------------------------------------------------|
| SUT1097 patient                               | Between exon 5 and 6, SNP1*, A/A<br>Between exon 5 and 6, SNP2**, T/T                                    |
| SUT1097 xenograft                             | Between exon 5 and 6, SNP1, A/A<br>Between exon 5 and 6, SNP2, T/T                                       |
| SUT1103 patient                               | Between exon 5 and 6, SNP1, C/A<br>Between exon 5 and 6, SNP2, G/T                                       |
| SUT1103 xenograft                             | Between exon 5 and 6, SNP1, C/A<br>Between exon 5 and 6, SNP2, G/T                                       |
| SUT1110 patient                               | None                                                                                                     |
| SUT1110 xenograft                             | None                                                                                                     |
| SUT1151 patient                               | None                                                                                                     |
| SUT1151 xenograft                             | None                                                                                                     |
| SUT1151M patient                              | Between exon 5 and 6, SNP1, C/A                                                                          |
| SUT1151M xenograft                            | None                                                                                                     |
| SUT1319 patient                               | Between exon 5 and 6, SNP1, C/A<br>Between exon 5 and 6, SNP2, G/T<br>Between exon 6 and 7, SNP3***, T/C |
| SUT1319 xenograft passage 3                   | Between exon 5 and 6, SNP1, C/A<br>Between exon 5 and 6, SNP2, G/T<br>Between exon 6 and 7, SNP3, T/C    |
| SUT1319 xenograft passage 5                   | Between exon 5 and 6, SNP1, C/A<br>Between exon 5 and 6, SNP2, G/T<br>Between exon 6 and 7, SNP3, T/C    |
| SUT1319 xenograft passage 5 rapamycin-treated | Between exon 5 and 6, SNP1, C/A<br>Between exon 5 and 6, SNP2, G/T<br>Between exon 6 and 7, SNP3, T/C    |
| SUT1368 patient                               | Between exon 5 and 6, SNP1, C/A                                                                          |
| SUT1368 xenograft                             | Between exon 5 and 6, SNP1, C/A                                                                          |

\* SNP1: rs:2699896, C>A \*\* SNP2: rs:3729676, G>T \*\*\* SNP3: rs:3729682, T>C
